# Supplementary material for: Pd Single-Atom Sites on the Surface of PdAu Nanoparticles: A DFT-Based Topological Search for Suitable Compositions
Source: PubMed Central journal article supplement (PMC7828025; doi:10.3390/nano11010122), 2021-01-07
Supplement: nanomaterials-11-00122-s001.pdf [file nanomaterials-11-00122-s001.pdf]

## Supplementary Materials

# Pd Single-Atom Sites on the Surface of PdAu Nanoparticles: A DFT-Based Topological Search for Suitable Compositions

Mikhail Mamatkulov<sup>1</sup>, Ilya V. Yudanov<sup>1,\*</sup>, Andrey V. Bukhtiyarov<sup>1</sup> and  
Konstantin M. Neyman<sup>2,3,\*</sup>

<sup>1</sup> Boreskov Institute of Catalysis of the Siberian Branch of the Russian Academy of Sciences (BIC SB RAS), 630090 Novosibirsk, Russia; mikhail@catalysis.ru (M.M); yudanov@catalysis.ru (I.V.Y.); avb@catalysis.ru (A.V.B.)

<sup>2</sup> Departament de Ciència de Materials i Química Física and Institut de Química Teòrica i Computacional, Universitat de Barcelona, c/Martí i Franquès 1, 08028 Barcelona, Spain; konstantin.neyman@ub.edu

<sup>3</sup> ICREA (Institució Catalana de Recerca i Estudis Avançats), Pg. Lluís Companys 23, 08010 Barcelona, Spain; konstantin.neyman@icrea.cat

\* Correspondence: yudanov@catalysis.ru (I.V.Y.); konstantin.neyman@icrea.cat (K.M.N.)

### Content of Supplementary Materials:

**Figure S1.** Topological energy descriptors as function of Pd:Au ratio in the compositions Pd<sub>m</sub>Au<sub>201-m</sub> (m = 56, 79, 101) of model NP<sub>201</sub>.

**Table S1.** Topological energy descriptors for the compositions Pd<sub>m</sub>Au<sub>201-m</sub> (m = 51, 62, 67, 73) of model NP<sub>201</sub>.

**Table S2.** Energetic and topological characteristics of low-lying homotops of Pd<sub>m</sub>Au<sub>201-m</sub> compositions with m = 51, 56, 62, 67, 73, 79.

**Table S3.** Energetic and topological characteristics of low-lying homotops of Pd<sub>101</sub>Au<sub>100</sub> composition.

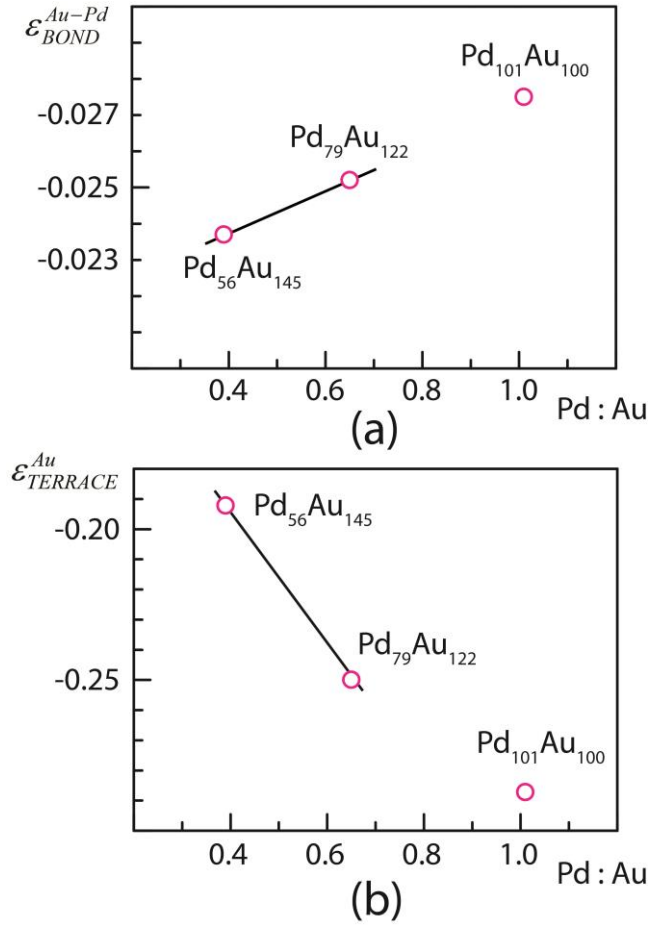

**Figure S1.** Topological energy descriptors  $\mathcal{E}_{BOND}^{Au-Pd}$  (a) and  $\mathcal{E}_{TERRACE}^{Au}$  (b) as function of Pd:Au ratio in the compositions Pd<sub>m</sub>Au<sub>201-m</sub> (m = 56, 79, 101) of model NP<sub>201</sub>. Full list of the descriptors is presented in Table 1. The linear approximations (shown by solid lines) were used to obtain the topological energy descriptors for compositions between Pd<sub>56</sub>Au<sub>145</sub> and Pd<sub>79</sub>Au<sub>122</sub> ones (see Table S1).

**Table S1.** Topological energy descriptors for the compositions Pd<sub>m</sub>Au<sub>201-m</sub> (m= 51, 62, 67, 73) based on linear approximations (the examples of  $\mathcal{E}_{BOND}^{Au-Pd}$  and  $\mathcal{E}_{TERRACE}^{Au}$  are shown in Fig. S1) of the descriptors optimized for Pd<sub>56</sub>Au<sub>145</sub> and Pd<sub>79</sub>Au<sub>122</sub>.

|                                                           | Pd <sub>51</sub> Au <sub>150</sub> | Pd <sub>62</sub> Au <sub>139</sub> | Pd <sub>67</sub> Au <sub>134</sub> | Pd <sub>73</sub> Au <sub>128</sub> |
|-----------------------------------------------------------|------------------------------------|------------------------------------|------------------------------------|------------------------------------|
| $E_0$                                                     | -662.001                           | -677.821                           | -685.870                           | -696.359                           |
| $\mathcal{E}_{BOND}^{Au-Pd}$                              | -0.0266                            | -0.0260                            | -0.0257                            | -0.0252                            |
| $\mathcal{E}_{TERRACE}^{Au}$                              | -0.1820                            | -0.2055                            | -0.2174                            | -0.2330                            |
| $\mathcal{E}_{EDGE}^{Au}$                                 | -0.3349                            | -0.3384                            | -0.3403                            | -0.3426                            |
| $\mathcal{E}_{CORNER}^{Au}$                               | -0.3675                            | -0.3737                            | -0.3768                            | -0.3809                            |
| $\mathcal{E}_{TERRACE}^{Au} / \mathcal{E}_{BOND}^{Au-Pd}$ | 6.84                               | 7.91                               | 8.48                               | 9.24                               |

**Table S2.** Energetic and topological characteristics of low-lying homotops of the compositions  $\text{Pd}_m\text{Au}_{201-m}$  ( $m = 51, 56, 62, 67, 73, 79$ ). The total energies  $E_{\text{DFT}}$  and  $E_{\text{TOP}}$  are calculated by TOP and DFT approaches, respectively. The relative energies  $\Delta E_{\text{DFT}}$  and  $\Delta E_{\text{TOP}}$  are calculated with respect to the homotop with the lowest  $E_{\text{DFT}}$ . In the listed homotops the sites on edges, corners and (001) facets are occupied by Au atoms. The surface Pd atoms,  $N_{\text{TERRACE}}^{\text{Pd}}$  (if any), are located on (111) facets.

| Homotop number in $\text{NP}_{201}$               | $E_{\text{DFT}}$ | $\Delta E_{\text{DFT}}$ | $E_{\text{TOP}}$ | $\Delta E_{\text{TOP}}$ | $N_{\text{BOND}}^{\text{Au-Pd}}$ | $N_{\text{CORE}}^{\text{Au}}$ | $N_{\text{TERRACE}}^{\text{Au}}$ | $N_{\text{TERRACE}}^{\text{Pd}}$ |
|---------------------------------------------------|------------------|-------------------------|------------------|-------------------------|----------------------------------|-------------------------------|----------------------------------|----------------------------------|
| <b><math>\text{Pd}_{51}\text{Au}_{150}</math></b> |                  |                         |                  |                         |                                  |                               |                                  |                                  |
| 1                                                 | -703.436         | 0.000                   | -705.186         | 0.000                   | 435                              | 31                            | 53                               | 3                                |
| 2                                                 | -703.293         | 0.143                   | -705.191         | -0.004                  | 442                              | 32                            | 52                               | 4                                |
| 3                                                 | -703.270         | 0.166                   | -705.178         | 0.008                   | 421                              | 29                            | 55                               | 1                                |
| 4                                                 | -703.259         | 0.177                   | -705.195         | -0.008                  | 449                              | 33                            | 51                               | 5                                |
| 5                                                 | -703.248         | 0.188                   | -705.174         | 0.013                   | 414                              | 28                            | 56                               | 0                                |
| 6                                                 | -703.232         | 0.204                   | -705.125         | 0.062                   | 419                              | 29                            | 55                               | 1                                |
| 7                                                 | -703.229         | 0.207                   | -705.121         | 0.066                   | 412                              | 28                            | 56                               | 0                                |
| 8                                                 | -703.227         | 0.209                   | -705.186         | 0.000                   | 435                              | 31                            | 53                               | 3                                |
| 9                                                 | -703.220         | 0.216                   | -705.199         | -0.013                  | 456                              | 34                            | 50                               | 6                                |
| 10                                                | -703.202         | 0.234                   | -705.027         | 0.160                   | 429                              | 31                            | 53                               | 3                                |
| 11                                                | -703.191         | 0.245                   | -705.203         | -0.017                  | 463                              | 35                            | 49                               | 7                                |
| 12                                                | -703.173         | 0.263                   | -705.182         | 0.004                   | 428                              | 30                            | 54                               | 2                                |
| 13                                                | -703.158         | 0.278                   | -705.133         | 0.053                   | 433                              | 31                            | 53                               | 3                                |
| 14                                                | -703.125         | 0.311                   | -705.018         | 0.168                   | 415                              | 29                            | 55                               | 1                                |
| 15                                                | -703.119         | 0.317                   | -705.101         | 0.085                   | 466                              | 36                            | 48                               | 8                                |
| 16                                                | -703.114         | 0.322                   | -705.076         | 0.111                   | 424                              | 30                            | 54                               | 2                                |
| 17                                                | -703.104         | 0.332                   | -705.072         | 0.115                   | 417                              | 29                            | 55                               | 1                                |
| 18                                                | -703.091         | 0.345                   | -704.908         | 0.279                   | 404                              | 28                            | 56                               | 0                                |
| 19                                                | -703.070         | 0.366                   | -704.969         | 0.217                   | 420                              | 30                            | 54                               | 2                                |
| 20                                                | -703.063         | 0.373                   | -704.859         | 0.328                   | 409                              | 29                            | 55                               | 1                                |
| 21                                                | -702.983         | 0.453                   | -704.810         | 0.377                   | 414                              | 30                            | 54                               | 2                                |
| 22                                                | -702.975         | 0.461                   | -704.916         | 0.270                   | 418                              | 30                            | 54                               | 2                                |
| 23                                                | -702.914         | 0.522                   | -704.646         | 0.540                   | 401                              | 29                            | 55                               | 1                                |
| 24                                                | -702.911         | 0.525                   | -704.757         | 0.430                   | 412                              | 30                            | 54                               | 2                                |
| 25                                                | -702.866         | 0.570                   | -704.703         | 0.483                   | 410                              | 30                            | 54                               | 2                                |
| 26                                                | -702.828         | 0.608                   | -704.892         | 0.294                   | 465                              | 37                            | 47                               | 9                                |
| 27                                                | -702.576         | 0.860                   | -704.631         | 0.556                   | 462                              | 38                            | 46                               | 10                               |

**Table S2.** Continued.

| Homotop number in $\text{NP}_{201}$               | $E_{\text{DFT}}$ | $\Delta E_{\text{DFT}}$ | $E_{\text{TOP}}$ | $\Delta E_{\text{TOP}}$ | $N_{\text{BOND}}^{\text{Au-Pd}}$ | $N_{\text{CORE}}^{\text{Au}}$ | $N_{\text{TERRACE}}^{\text{Au}}$ | $N_{\text{TERRACE}}^{\text{Pd}}$ |
|---------------------------------------------------|------------------|-------------------------|------------------|-------------------------|----------------------------------|-------------------------------|----------------------------------|----------------------------------|
| <b><math>\text{Pd}_{56}\text{Au}_{145}</math></b> |                  |                         |                  |                         |                                  |                               |                                  |                                  |
| 1                                                 | -712.881         | 0.000                   | -712.863         | 0.000                   | 464                              | 29                            | 50                               | 6                                |
| 2                                                 | -712.862         | 0.019                   | -712.810         | 0.053                   | 462                              | 29                            | 50                               | 6                                |
| 3                                                 | -712.856         | 0.025                   | -712.847         | 0.016                   | 478                              | 31                            | 48                               | 8                                |
| 4                                                 | -712.853         | 0.028                   | -712.819         | 0.044                   | 455                              | 28                            | 51                               | 5                                |
| 5                                                 | -712.834         | 0.047                   | -712.802         | 0.061                   | 469                              | 30                            | 49                               | 7                                |
| 6                                                 | -712.822         | 0.059                   | -712.794         | 0.069                   | 476                              | 31                            | 48                               | 8                                |
| 7                                                 | -712.804         | 0.077                   | -712.766         | 0.097                   | 453                              | 28                            | 51                               | 5                                |
| 8                                                 | -712.802         | 0.079                   | -712.758         | 0.105                   | 460                              | 29                            | 50                               | 6                                |
| 9                                                 | -712.801         | 0.080                   | -712.855         | 0.008                   | 471                              | 30                            | 49                               | 7                                |

|    |          |       |          |        |     |    |    |   |
|----|----------|-------|----------|--------|-----|----|----|---|
| 10 | -712.798 | 0.083 | -712.750 | 0.113  | 467 | 30 | 49 | 7 |
| 11 | -712.788 | 0.093 | -712.827 | 0.036  | 448 | 27 | 52 | 4 |
| 12 | -712.783 | 0.098 | -712.899 | -0.036 | 480 | 31 | 48 | 8 |
| 13 | -712.777 | 0.104 | -712.705 | 0.158  | 458 | 29 | 50 | 6 |
| 14 | -712.768 | 0.113 | -712.713 | 0.150  | 451 | 28 | 51 | 5 |
| 15 | -712.740 | 0.141 | -712.722 | 0.142  | 444 | 27 | 52 | 4 |
| 16 | -712.730 | 0.151 | -712.705 | 0.158  | 458 | 29 | 50 | 6 |
| 17 | -712.718 | 0.163 | -712.697 | 0.166  | 465 | 30 | 49 | 7 |
| 18 | -712.685 | 0.196 | -712.653 | 0.210  | 456 | 29 | 50 | 6 |
| 19 | -712.654 | 0.227 | -712.616 | 0.247  | 440 | 27 | 52 | 4 |
| 20 | -712.643 | 0.238 | -712.608 | 0.255  | 447 | 28 | 51 | 5 |
| 21 | -712.631 | 0.250 | -712.661 | 0.202  | 449 | 28 | 51 | 5 |
| 22 | -712.591 | 0.290 | -712.628 | 0.235  | 477 | 32 | 47 | 9 |
| 23 | -712.577 | 0.304 | -712.754 | 0.109  | 416 | 23 | 56 | 0 |
| 24 | -712.548 | 0.333 | -712.596 | 0.267  | 410 | 23 | 56 | 0 |
| 25 | -712.543 | 0.338 | -712.527 | 0.336  | 422 | 25 | 54 | 2 |
| 26 | -712.505 | 0.376 | -712.484 | 0.379  | 477 | 32 | 48 | 8 |
| 27 | -712.502 | 0.379 | -712.422 | 0.441  | 418 | 25 | 54 | 2 |
| 28 | -712.494 | 0.387 | -712.390 | 0.473  | 446 | 29 | 50 | 6 |
| 29 | -712.493 | 0.388 | -712.701 | 0.162  | 414 | 23 | 56 | 0 |
| 30 | -712.477 | 0.404 | -712.345 | 0.518  | 437 | 28 | 51 | 5 |
| 31 | -712.471 | 0.410 | -712.467 | 0.396  | 427 | 26 | 53 | 3 |
| 32 | -712.411 | 0.470 | -712.414 | 0.449  | 425 | 26 | 53 | 3 |
| 33 | -712.390 | 0.491 | -712.329 | 0.534  | 451 | 30 | 49 | 7 |
| 34 | -712.380 | 0.501 | -712.353 | 0.510  | 430 | 27 | 52 | 4 |
| 35 | -712.339 | 0.542 | -712.276 | 0.587  | 449 | 30 | 49 | 7 |
| 36 | -712.193 | 0.688 | -712.119 | 0.745  | 443 | 30 | 49 | 7 |
| 37 | -712.146 | 0.735 | -712.110 | 0.753  | 450 | 31 | 48 | 8 |
| 38 | -712.012 | 0.869 | -712.005 | 0.858  | 446 | 31 | 48 | 8 |

**Table S2.** Continued.

| Homotop<br>number<br>in NP <sub>201</sub> | $E_{\text{DFT}}$ | $\Delta E_{\text{DFT}}$ | $E_{\text{TOP}}$ | $\Delta E_{\text{TOP}}$ | $N_{\text{BOND}}^{\text{Au-Pd}}$ | $N_{\text{CORE}}^{\text{Au}}$ | $N_{\text{TERRACE}}^{\text{Au}}$ | $N_{\text{TERRACE}}^{\text{Pd}}$ |
|-------------------------------------------|------------------|-------------------------|------------------|-------------------------|----------------------------------|-------------------------------|----------------------------------|----------------------------------|
| <b>Pd<sub>62</sub>Au<sub>139</sub></b>    |                  |                         |                  |                         |                                  |                               |                                  |                                  |
| 1                                         | -723.795         | 0.00                    | -722.3362        | 0.000                   | 456                              | 23                            | 50                               | 6                                |
| 2                                         | -723.772         | 0.02                    | -722.2137        | 0.122                   | 475                              | 26                            | 47                               | 9                                |
| 3                                         | -723.755         | 0.04                    | -722.3412        | -0.005                  | 472                              | 25                            | 48                               | 8                                |
| 4                                         | -723.732         | 0.06                    | -722.3077        | 0.029                   | 447                              | 22                            | 51                               | 5                                |
| 5                                         | -723.718         | 0.08                    | -722.3312        | 0.005                   | 440                              | 21                            | 52                               | 4                                |
| 6                                         | -723.712         | 0.08                    | -722.2372        | 0.099                   | 468                              | 25                            | 48                               | 8                                |
| 7                                         | -723.708         | 0.09                    | -722.3127        | 0.024                   | 463                              | 24                            | 49                               | 7                                |
| 8                                         | -723.692         | 0.10                    | -722.1852        | 0.151                   | 466                              | 25                            | 48                               | 8                                |
| 9                                         | -723.691         | 0.10                    | -722.2892        | 0.047                   | 470                              | 25                            | 48                               | 8                                |
| 10                                        | -723.674         | 0.12                    | -722.3547        | -0.019                  | 433                              | 20                            | 53                               | 3                                |
| 11                                        | -723.657         | 0.14                    | -722.1332        | 0.203                   | 464                              | 25                            | 48                               | 8                                |
| 12                                        | -723.657         | 0.14                    | -722.2087        | 0.128                   | 459                              | 24                            | 49                               | 7                                |
| 13                                        | -723.655         | 0.14                    | -722.0812        | 0.255                   | 462                              | 25                            | 48                               | 8                                |
| 14                                        | -723.654         | 0.14                    | -722.2322        | 0.104                   | 452                              | 23                            | 50                               | 6                                |
| 15                                        | -723.638         | 0.16                    | -722.1382        | 0.198                   | 480                              | 27                            | 46                               | 10                               |
| 16                                        | -723.637         | 0.16                    | -722.3782        | -0.042                  | 426                              | 19                            | 54                               | 2                                |
| 17                                        | -723.629         | 0.17                    | -722.3497        | -0.014                  | 417                              | 18                            | 55                               | 1                                |

|    |          |      |           |       |     |    |    |    |
|----|----------|------|-----------|-------|-----|----|----|----|
| 18 | -723.610 | 0.19 | -722.1567 | 0.180 | 457 | 24 | 49 | 7  |
| 19 | -723.608 | 0.19 | -722.0577 | 0.279 | 469 | 26 | 47 | 9  |
| 20 | -723.600 | 0.19 | -722.1802 | 0.156 | 450 | 23 | 50 | 6  |
| 21 | -723.600 | 0.19 | -722.0627 | 0.274 | 485 | 28 | 45 | 11 |
| 22 | -723.567 | 0.23 | -722.0392 | 0.297 | 492 | 29 | 44 | 12 |
| 23 | -723.404 | 0.39 | -721.9117 | 0.424 | 495 | 30 | 43 | 13 |
| 24 | -723.338 | 0.46 | -721.6567 | 0.679 | 501 | 32 | 41 | 15 |
| 25 | -723.330 | 0.47 | -721.7842 | 0.552 | 498 | 31 | 42 | 14 |
| 26 | -723.127 | 0.67 | -721.5292 | 0.807 | 504 | 33 | 40 | 16 |
| 27 | -722.775 | 1.02 | -721.4017 | 0.934 | 507 | 34 | 39 | 17 |
| 28 | -722.706 | 1.09 | -721.2742 | 1.062 | 510 | 35 | 38 | 18 |

**Table S2.** Continued.

| Homotop<br>number<br>in NP <sub>201</sub> | $E_{\text{DFT}}$ | $\Delta E_{\text{DFT}}$ | $E_{\text{TOP}}$ | $\Delta E_{\text{TOP}}$ | $N_{\text{BOND}}^{\text{Au-Pd}}$ | $N_{\text{CORE}}^{\text{Au}}$ | $N_{\text{TERRACE}}^{\text{Au}}$ | $N_{\text{TERRACE}}^{\text{Pd}}$ |
|-------------------------------------------|------------------|-------------------------|------------------|-------------------------|----------------------------------|-------------------------------|----------------------------------|----------------------------------|
| <b>Pd<sub>67</sub>Au<sub>134</sub></b>    |                  |                         |                  |                         |                                  |                               |                                  |                                  |
| 1                                         | -732.4618        | 0.000                   | -730.712         | 0.000                   | 451                              | 19                            | 49                               | 7                                |
| 2                                         | -732.4613        | 0.000                   | -730.674         | 0.038                   | 458                              | 20                            | 48                               | 8                                |
| 3                                         | -732.4471        | 0.015                   | -730.698         | 0.014                   | 442                              | 18                            | 50                               | 6                                |
| 4                                         | -732.4289        | 0.033                   | -730.581         | 0.131                   | 429                              | 17                            | 51                               | 5                                |
| 5                                         | -732.4197        | 0.042                   | -730.660         | 0.051                   | 449                              | 19                            | 49                               | 7                                |
| 6                                         | -732.4122        | 0.050                   | -730.571         | 0.140                   | 454                              | 20                            | 48                               | 8                                |
| 7                                         | -732.4042        | 0.058                   | -730.609         | 0.103                   | 447                              | 19                            | 49                               | 7                                |
| 8                                         | -732.3997        | 0.062                   | -730.534         | 0.178                   | 461                              | 21                            | 47                               | 9                                |
| 9                                         | -732.3970        | 0.065                   | -730.684         | 0.028                   | 433                              | 17                            | 51                               | 5                                |
| 10                                        | -732.3776        | 0.084                   | -730.567         | 0.144                   | 420                              | 16                            | 52                               | 4                                |
| 11                                        | -732.3705        | 0.091                   | -730.520         | 0.192                   | 452                              | 20                            | 48                               | 8                                |
| 12                                        | -732.3318        | 0.130                   | -730.445         | 0.267                   | 466                              | 22                            | 46                               | 10                               |
| 13                                        | -732.3195        | 0.142                   | -730.459         | 0.253                   | 475                              | 23                            | 45                               | 11                               |
| 14                                        | -732.3055        | 0.156                   | -730.502         | 0.210                   | 409                              | 15                            | 53                               | 3                                |
| 15                                        | -732.2990        | 0.163                   | -730.506         | 0.206                   | 443                              | 19                            | 49                               | 7                                |
| 16                                        | -732.2957        | 0.166                   | -730.544         | 0.168                   | 436                              | 18                            | 50                               | 6                                |
| 17                                        | -732.2918        | 0.170                   | -730.421         | 0.290                   | 482                              | 24                            | 44                               | 12                               |
| 18                                        | -732.2855        | 0.176                   | -730.295         | 0.417                   | 494                              | 26                            | 42                               | 14                               |
| 19                                        | -732.2640        | 0.198                   | -730.614         | 0.097                   | 388                              | 12                            | 56                               | 0                                |
| 20                                        | -732.2590        | 0.203                   | -730.384         | 0.328                   | 489                              | 25                            | 43                               | 13                               |
| 21                                        | -732.2386        | 0.223                   | -730.366         | 0.346                   | 446                              | 20                            | 48                               | 8                                |
| 22                                        | -732.2164        | 0.245                   | -730.417         | 0.294                   | 448                              | 20                            | 48                               | 8                                |
| 23                                        | -732.2005        | 0.261                   | -730.206         | 0.506                   | 499                              | 27                            | 41                               | 15                               |
| 24                                        | -732.1938        | 0.268                   | -730.389         | 0.322                   | 430                              | 18                            | 50                               | 6                                |
| 25                                        | -732.1837        | 0.278                   | -730.314         | 0.397                   | 444                              | 20                            | 48                               | 8                                |
| 26                                        | -732.0744        | 0.387                   | -730.166         | 0.546                   | 379                              | 13                            | 55                               | 1                                |
| 27                                        | -732.0591        | 0.403                   | -730.028         | 0.683                   | 509                              | 29                            | 39                               | 17                               |
| 28                                        | -731.9624        | 0.499                   | -730.025         | 0.686                   | 382                              | 14                            | 54                               | 2                                |
| 29                                        | -731.9514        | 0.510                   | -729.888         | 0.824                   | 512                              | 30                            | 38                               | 18                               |
| 30                                        | -731.8487        | 0.613                   | -729.748         | 0.964                   | 515                              | 31                            | 37                               | 19                               |
| 31                                        | -731.7790        | 0.683                   | -729.860         | 0.851                   | 494                              | 28                            | 40                               | 16                               |

Table S2. Continued.

| Homotop<br>number<br>in NP <sub>201</sub> | $E_{\text{DFT}}$ | $\Delta E_{\text{DFT}}$ | $E_{\text{TOP}}$ | $\Delta E_{\text{TOP}}$ | $N_{\text{BOND}}^{\text{Au-Pd}}$ | $N_{\text{CORE}}^{\text{Au}}$ | $N_{\text{TERRACE}}^{\text{Au}}$ | $N_{\text{TERRACE}}^{\text{Pd}}$ |
|-------------------------------------------|------------------|-------------------------|------------------|-------------------------|----------------------------------|-------------------------------|----------------------------------|----------------------------------|
| <b>Pd<sub>73</sub>Au<sub>128</sub></b>    |                  |                         |                  |                         |                                  |                               |                                  |                                  |
| 1                                         | -742.829         | 0.000                   | -708.149         | 0.000                   | 450                              | 16                            | 46                               | 10                               |
| 2                                         | -742.695         | 0.134                   | -708.092         | 0.057                   | 457                              | 17                            | 45                               | 11                               |
| 3                                         | -742.680         | 0.149                   | -708.117         | 0.032                   | 421                              | 13                            | 49                               | 7                                |
| 4                                         | -742.674         | 0.155                   | -708.111         | 0.038                   | 430                              | 14                            | 48                               | 8                                |
| 5                                         | -742.670         | 0.159                   | -708.104         | 0.044                   | 439                              | 15                            | 47                               | 9                                |
| 6                                         | -742.666         | 0.163                   | -708.042         | 0.107                   | 455                              | 17                            | 45                               | 11                               |
| 7                                         | -742.577         | 0.252                   | -708.035         | 0.113                   | 464                              | 18                            | 44                               | 12                               |
| 8                                         | -742.565         | 0.264                   | -707.991         | 0.157                   | 453                              | 17                            | 45                               | 11                               |
| 9                                         | -742.544         | 0.285                   | -708.048         | 0.101                   | 446                              | 16                            | 46                               | 10                               |
| 10                                        | -742.543         | 0.286                   | -708.073         | 0.076                   | 410                              | 12                            | 50                               | 6                                |
| 11                                        | -742.530         | 0.299                   | -708.079         | 0.070                   | 401                              | 11                            | 51                               | 5                                |
| 12                                        | -742.512         | 0.317                   | -708.085         | 0.064                   | 392                              | 10                            | 52                               | 4                                |
| 13                                        | -742.474         | 0.355                   | -707.809         | 0.340                   | 492                              | 22                            | 40                               | 16                               |
| 14                                        | -742.460         | 0.369                   | -707.771         | 0.378                   | 472                              | 20                            | 42                               | 14                               |
| 15                                        | -742.435         | 0.394                   | -708.004         | 0.145                   | 435                              | 15                            | 47                               | 9                                |
| 16                                        | -742.409         | 0.420                   | -707.866         | 0.283                   | 485                              | 21                            | 41                               | 15                               |
| 17                                        | -742.407         | 0.422                   | -707.997         | 0.151                   | 444                              | 16                            | 46                               | 10                               |
| 18                                        | -742.400         | 0.429                   | -707.979         | 0.170                   | 471                              | 19                            | 43                               | 13                               |
| 19                                        | -742.388         | 0.441                   | -707.947         | 0.202                   | 442                              | 16                            | 46                               | 10                               |
| 20                                        | -742.387         | 0.442                   | -707.890         | 0.258                   | 449                              | 17                            | 45                               | 11                               |
| 21                                        | -742.367         | 0.462                   | -707.752         | 0.396                   | 499                              | 23                            | 39                               | 17                               |
| 22                                        | -742.324         | 0.505                   | -707.834         | 0.315                   | 456                              | 18                            | 44                               | 12                               |
| 23                                        | -742.320         | 0.509                   | -708.041         | 0.108                   | 381                              | 9                             | 53                               | 3                                |
| 24                                        | -742.289         | 0.540                   | -708.047         | 0.102                   | 372                              | 8                             | 54                               | 2                                |
| 25                                        | -742.282         | 0.547                   | -708.053         | 0.095                   | 363                              | 7                             | 55                               | 1                                |
| 26                                        | -742.227         | 0.602                   | -707.645         | 0.503                   | 504                              | 24                            | 38                               | 18                               |
| 27                                        | -742.218         | 0.611                   | -707.721         | 0.428                   | 470                              | 20                            | 42                               | 14                               |
| 28                                        | -742.193         | 0.636                   | -707.488         | 0.661                   | 507                              | 25                            | 37                               | 19                               |
| 29                                        | -742.181         | 0.648                   | -707.664         | 0.485                   | 477                              | 21                            | 41                               | 15                               |

Table S2. Continued.

| Homotop<br>number<br>in NP <sub>201</sub> | $E_{\text{DFT}}$ | $\Delta E_{\text{DFT}}$ | $E_{\text{TOP}}$ | $\Delta E_{\text{TOP}}$ | $N_{\text{BOND}}^{\text{Au-Pd}}$ | $N_{\text{CORE}}^{\text{Au}}$ | $N_{\text{TERRACE}}^{\text{Au}}$ | $N_{\text{TERRACE}}^{\text{Pd}}$ |
|-------------------------------------------|------------------|-------------------------|------------------|-------------------------|----------------------------------|-------------------------------|----------------------------------|----------------------------------|
| <b>Pd<sub>79</sub>Au<sub>122</sub></b>    |                  |                         |                  |                         |                                  |                               |                                  |                                  |
| 1                                         | -752.901         | 0.000                   | -752.661         | 0.000                   | 468                              | 16                            | 40                               | 16                               |
| 2                                         | -752.890         | 0.011                   | -752.661         | 0.000                   | 468                              | 16                            | 40                               | 16                               |
| 3                                         | -752.859         | 0.042                   | -752.661         | 0.000                   | 468                              | 16                            | 40                               | 16                               |
| 4                                         | -752.779         | 0.122                   | -752.692         | -0.031                  | 439                              | 13                            | 43                               | 13                               |
| 5                                         | -752.742         | 0.159                   | -752.584         | 0.077                   | 475                              | 17                            | 39                               | 17                               |
| 6                                         | -752.690         | 0.211                   | -752.611         | 0.050                   | 466                              | 16                            | 40                               | 16                               |
| 7                                         | -752.646         | 0.255                   | -752.535         | 0.126                   | 473                              | 17                            | 39                               | 17                               |
| 8                                         | -752.585         | 0.316                   | -752.620         | 0.041                   | 426                              | 12                            | 44                               | 12                               |
| 9                                         | -752.579         | 0.322                   | -752.724         | -0.063                  | 410                              | 10                            | 46                               | 10                               |

|    |          |       |          |        |     |    |    |    |
|----|----------|-------|----------|--------|-----|----|----|----|
| 10 | -752.544 | 0.357 | -752.431 | 0.230  | 489 | 19 | 37 | 19 |
| 11 | -752.542 | 0.359 | -752.490 | 0.171  | 451 | 15 | 41 | 15 |
| 12 | -752.530 | 0.371 | -752.539 | 0.122  | 453 | 15 | 41 | 15 |
| 13 | -752.525 | 0.376 | -752.589 | 0.072  | 455 | 15 | 41 | 15 |
| 14 | -752.522 | 0.379 | -752.697 | -0.036 | 419 | 11 | 45 | 11 |
| 15 | -752.510 | 0.391 | -752.440 | 0.221  | 449 | 15 | 41 | 15 |
| 16 | -752.501 | 0.400 | -752.643 | 0.018  | 437 | 13 | 43 | 13 |
| 17 | -752.498 | 0.403 | -752.616 | 0.045  | 446 | 14 | 42 | 14 |
| 18 | -752.497 | 0.404 | -752.701 | -0.040 | 399 | 9  | 47 | 9  |
| 19 | -752.484 | 0.417 | -752.647 | 0.014  | 417 | 11 | 45 | 11 |
| 20 | -752.483 | 0.418 | -752.566 | 0.095  | 444 | 14 | 42 | 14 |
| 21 | -752.483 | 0.418 | -752.755 | -0.094 | 381 | 7  | 49 | 7  |
| 22 | -752.475 | 0.426 | -752.593 | 0.068  | 435 | 13 | 43 | 13 |
| 23 | -752.467 | 0.434 | -752.728 | -0.067 | 390 | 8  | 48 | 8  |
| 24 | -752.457 | 0.444 | -752.728 | -0.067 | 390 | 8  | 48 | 8  |
| 25 | -752.434 | 0.467 | -752.305 | 0.356  | 494 | 20 | 36 | 20 |
| 26 | -752.427 | 0.474 | -752.503 | 0.158  | 391 | 9  | 47 | 9  |
| 27 | -752.396 | 0.505 | -752.337 | 0.324  | 465 | 17 | 39 | 17 |
| 28 | -752.391 | 0.510 | -752.214 | 0.447  | 363 | 7  | 50 | 6  |
| 29 | -752.358 | 0.543 | -752.359 | 0.302  | 476 | 18 | 38 | 18 |
| 30 | -752.357 | 0.544 | -752.314 | 0.347  | 454 | 16 | 40 | 16 |
| 31 | -752.325 | 0.576 | -752.111 | 0.550  | 487 | 19 | 39 | 17 |
| 32 | -752.316 | 0.585 | -752.260 | 0.401  | 472 | 18 | 38 | 18 |
| 33 | -752.252 | 0.649 | -752.399 | 0.262  | 431 | 13 | 44 | 12 |
| 34 | -752.227 | 0.674 | -752.188 | 0.473  | 459 | 17 | 39 | 17 |
| 35 | -752.185 | 0.716 | -752.138 | 0.523  | 457 | 17 | 39 | 17 |
| 36 | -752.107 | 0.794 | -751.903 | 0.758  | 276 | 0  | 56 | 0  |

---

**Table S3.** Energetic and topological characteristics of low-lying homotops of Pd<sub>101</sub>Au<sub>100</sub> composition.

|    | $E_{\text{DFT}}$ | $\Delta E_{\text{DFT}}$ | $E_{\text{TOP}}$ | $\Delta E_{\text{TOP}}$ | $N_{\text{BOND}}^{\text{Au-Pd}}$ | $N_{\text{CORE}}^{\text{Au}}$ | $N_{\text{EDGE}}^{\text{Au}}$ | $N_{\text{CORNER}}^{\text{Au}}$ | $N_{001}^{\text{Pd}}$ | $N_{111}^{\text{Pd}}$ |
|----|------------------|-------------------------|------------------|-------------------------|----------------------------------|-------------------------------|-------------------------------|---------------------------------|-----------------------|-----------------------|
| 1  | -790.314         | 0.000                   | -790.216         | 0.000                   | 384                              | 3                             | 36                            | 24                              | 1                     | 24                    |
| 2  | -790.295         | 0.018                   | -790.132         | 0.084                   | 342                              | 0                             | 36                            | 24                              | 0                     | 22                    |
| 3  | -790.286         | 0.027                   | -790.132         | 0.084                   | 342                              | 0                             | 36                            | 24                              | 0                     | 22                    |
| 4  | -790.245         | 0.068                   | -790.233         | -0.017                  | 372                              | 2                             | 36                            | 24                              | 0                     | 24                    |
| 5  | -790.228         | 0.086                   | -790.087         | 0.129                   | 340                              | 0                             | 36                            | 24                              | 0                     | 22                    |
| 6  | -790.205         | 0.108                   | -790.171         | 0.045                   | 382                              | 3                             | 36                            | 24                              | 1                     | 24                    |
| 7  | -790.198         | 0.116                   | -790.148         | 0.068                   | 381                              | 3                             | 36                            | 24                              | 0                     | 25                    |
| 8  | -790.152         | 0.161                   | -789.997         | 0.219                   | 336                              | 0                             | 36                            | 24                              | 0                     | 22                    |
| 9  | -790.143         | 0.170                   | -790.042         | 0.174                   | 338                              | 0                             | 36                            | 24                              | 0                     | 22                    |
| 10 | -790.112         | 0.201                   | -790.193         | 0.023                   | 383                              | 3                             | 36                            | 24                              | 0                     | 25                    |
| 11 | -790.104         | 0.209                   | -790.076         | 0.140                   | 365                              | 2                             | 36                            | 24                              | 1                     | 23                    |
| 12 | -790.102         | 0.212                   | -790.065         | 0.151                   | 339                              | 0                             | 36                            | 24                              | 1                     | 21                    |
| 13 | -790.101         | 0.212                   | -789.997         | 0.219                   | 336                              | 0                             | 36                            | 24                              | 0                     | 22                    |
| 14 | -790.044         | 0.270                   | -790.008         | 0.208                   | 362                              | 2                             | 36                            | 24                              | 0                     | 24                    |
| 15 | -790.038         | 0.275                   | -790.131         | 0.085                   | 393                              | 4                             | 36                            | 24                              | 1                     | 25                    |
| 16 | -790.032         | 0.281                   | -789.905         | 0.311                   | 365                              | 2                             | 36                            | 23                              | 0                     | 23                    |
| 17 | -790.024         | 0.289                   | -789.975         | 0.241                   | 335                              | 0                             | 36                            | 24                              | 1                     | 21                    |
| 18 | -790.020         | 0.294                   | -789.855         | 0.361                   | 350                              | 1                             | 36                            | 23                              | 0                     | 22                    |
| 19 | -789.998         | 0.316                   | -790.042         | 0.174                   | 394                              | 4                             | 35                            | 24                              | 0                     | 25                    |
| 20 | -789.994         | 0.320                   | -790.199         | 0.017                   | 396                              | 4                             | 36                            | 24                              | 2                     | 24                    |
| 21 | -789.992         | 0.322                   | -790.081         | 0.135                   | 378                              | 3                             | 36                            | 24                              | 1                     | 24                    |
| 22 | -789.968         | 0.346                   | -790.199         | 0.017                   | 396                              | 4                             | 36                            | 24                              | 2                     | 24                    |
| 23 | -789.934         | 0.380                   | -789.913         | 0.303                   | 345                              | 1                             | 36                            | 24                              | 0                     | 23                    |
| 24 | -789.926         | 0.388                   | -790.031         | 0.185                   | 363                              | 2                             | 36                            | 24                              | 1                     | 23                    |
| 25 | -789.917         | 0.397                   | -789.953         | 0.263                   | 339                              | 0                             | 35                            | 24                              | 1                     | 20                    |
| 26 | -789.900         | 0.414                   | -790.154         | 0.062                   | 394                              | 4                             | 36                            | 24                              | 2                     | 24                    |
| 27 | -789.863         | 0.450                   | -789.930         | 0.286                   | 333                              | 0                             | 36                            | 24                              | 1                     | 21                    |
| 28 | -789.858         | 0.456                   | -790.069         | 0.147                   | 403                              | 5                             | 36                            | 24                              | 0                     | 27                    |
| 29 | -789.841         | 0.473                   | -789.839         | 0.377                   | 380                              | 4                             | 36                            | 24                              | 0                     | 26                    |
| 30 | -789.836         | 0.478                   | -790.013         | 0.203                   | 375                              | 3                             | 36                            | 24                              | 0                     | 25                    |
| 31 | -789.832         | 0.482                   | -789.952         | 0.264                   | 334                              | 0                             | 36                            | 24                              | 2                     | 20                    |
| 32 | -789.824         | 0.490                   | -789.980         | 0.236                   | 348                              | 1                             | 36                            | 24                              | 1                     | 22                    |
| 33 | -789.819         | 0.494                   | -789.980         | 0.236                   | 348                              | 1                             | 36                            | 24                              | 1                     | 22                    |
| 34 | -789.796         | 0.517                   | -790.029         | 0.187                   | 414                              | 6                             | 36                            | 24                              | 0                     | 28                    |
| 35 | -789.796         | 0.517                   | -789.890         | 0.326                   | 344                              | 1                             | 36                            | 24                              | 1                     | 22                    |
| 36 | -789.778         | 0.536                   | -790.013         | 0.203                   | 375                              | 3                             | 36                            | 24                              | 2                     | 23                    |
